# Supplementary material for: Incidence of Voice Disorders among Private School Teachers in Taiwan: A Nationwide Longitudinal Study
Source: MDPI journal article supplement (doi:10.3390/ijerph19031130), 2022-01-20
Supplement: s1 [file s1]

**Table S1.** Occupation Codes of Longitudinal Health Insurance Database 2000.

| <b>Codes</b> | <b>Job description of The Beneficiary</b>                                         |
|--------------|-----------------------------------------------------------------------------------|
| A            | Central government civil servant<br>Public college teacher or staff               |
| B            | Local government civil servant<br>Public school (except college) teacher or staff |
| C            | Other public servant                                                              |
| D            | Private college teacher or staff                                                  |
| E            | Private elementary/high school teacher or staff                                   |
| F            | Government-owned company staff (under public insurance coverage)                  |
| G            | Government-owned company staff (under labor insurance coverage)                   |
| H            | Private company worker                                                            |
| I            | Central government worker                                                         |
| J            | Local government worker                                                           |
| K            | Private school worker                                                             |
| M            | Nongovernment organization worker                                                 |
| N            | Apprentice in the vocational skill training program                               |
| O            | Self-employed worker                                                              |
| P            | Professional and skilled person, self-employed                                    |
| Q            | Farmer<br>Fisherman                                                               |

**Table S2.** Outcome measured by *International Classification of Diseases*, Ninth Revision, Clinical Modification (ICD-9-CM) in the current study.

| <b>ICD-9-CM</b> | <b>Diagnosis</b>                                                                                                                                                                                  |
|-----------------|---------------------------------------------------------------------------------------------------------------------------------------------------------------------------------------------------|
| 478.4           | Polyp of vocal cord or larynx                                                                                                                                                                     |
| 478.5           | Other diseases of vocal cords: Abscess of vocal cords, Cellulitis of vocal cords, Granuloma of vocal cords, Leukoplakia of vocal cords, Chorditis (fibrinous) (nodosa) (tuberosa), Singers' nodes |
| 784.4           | Voice disturbance                                                                                                                                                                                 |
| 461             | Acute sinusitis                                                                                                                                                                                   |
| 473             | Chronic sinusitis                                                                                                                                                                                 |
| 464             | Acute laryngitis and tracheitis                                                                                                                                                                   |
| 476             | Chronic laryngitis                                                                                                                                                                                |
| 493             | Asthma                                                                                                                                                                                            |
| 530.11          | Reflux esophagitis                                                                                                                                                                                |
| 530.81          | Gastroesophageal reflux disease                                                                                                                                                                   |
| 305.0           | Alcohol abuse                                                                                                                                                                                     |
| 305.1           | Tobacco use disorder                                                                                                                                                                              |
| 296.1           | Manic disorder, recurrent episode                                                                                                                                                                 |
| 296.3           | Major depressive disorder, recurrent episode                                                                                                                                                      |
| 300.02          | Generalized anxiety disorder                                                                                                                                                                      |

**Table S3.** Regulations of teaching hours in Taiwan.

| <b>Level of School</b>                    | <b>Teaching Hours Per Week</b>                            |
|-------------------------------------------|-----------------------------------------------------------|
| Elementary school &<br>Junior high school | Not tutors: 16–20, should not exceed 20.<br>Tutors: 10–16 |
| Senior high school                        | Not tutors: 14–18<br>Tutors: 10–14                        |
| College                                   | Vocational school: 10–12                                  |

**Table S4.** Numbers and percentage of private school teachers and staff in 2000.

| <b>School year: 1999</b>         | <b>Teachers</b> | <b>Staff</b> | <b>Total</b>  |
|----------------------------------|-----------------|--------------|---------------|
| Primary school                   | 850             | 143          |               |
| Junior high school               | 318             | 87           |               |
| Senior high school               | 10,837          | 2316         |               |
| Vocational school                | 8653            | 2196         |               |
| <b>High or elementary school</b> | 20,658 (81%)    | 4742 (19%)   | 25,400 (100%) |
| Junior college                   | 6700            | 1385         |               |
| College                          | 9300            | 2405         |               |
| University                       | 8994            | 4068         |               |
| <b>College school</b>            | 24,994 (76%)    | 7858 (24%)   | 32,852 (100%) |
